# Supplementary material for: miR-155 as a Biomarker in B-Cell Malignancies
Source: Hindawi journal article supplement (doi:10.1155/2016/9513037), 2016-01-01

## Supplementary

**Table S1.** Search strategy in PubMed and EMBASE

| Database            | PubMed                                                                                                                                                                                                                                                                                                                                                                                                                                                                                                                                                                                                                                                                    | EMBASE                                                                                                                                                                                                                                                                                                                                                                                                                                             |
|---------------------|---------------------------------------------------------------------------------------------------------------------------------------------------------------------------------------------------------------------------------------------------------------------------------------------------------------------------------------------------------------------------------------------------------------------------------------------------------------------------------------------------------------------------------------------------------------------------------------------------------------------------------------------------------------------------|----------------------------------------------------------------------------------------------------------------------------------------------------------------------------------------------------------------------------------------------------------------------------------------------------------------------------------------------------------------------------------------------------------------------------------------------------|
| <b>Search Terms</b> | #1: "Lymphoma"[Mesh]<br>#2: lymphoma*<br>#3: "b-lymphocytes"[MeSH Terms] OR "b-lymphocytes" OR "B-cell"<br>#4: "Lymphoma, B-Cell"[Mesh]<br>#5: burkitt[tw]<br>#6: #1 OR #2 OR #3 OR #4 OR #5<br>#7: rno-miR-155 OR rno miR 155 OR rno-miR 155 5p OR rno-miR-155-5p<br>#8: mmu-mir-155 OR mmu mir 155 OR Mir155<br>#9: miR 155 OR miRNA 155 OR hsa mir 155 OR microRNA 155<br>#10: miR-155 OR miRNA 155 OR hsa-mir-155 OR microRNA-155<br>#11: "MIRN155 microRNA, human"[Supplementary Concept] OR "MIRN155 microRNA, rat"[Supplementary Concept] OR "Mirn155 microRNA, mouse"[Supplementary Concept]<br>#12: #7 OR #8 OR #9 OR #10 OR #11<br>#13: #6 OR #12<br>No filters | #1: microRNA 155/<br>#2: (rno-miR-155 or rno miR 155 or rno-miR 155 5p or rno-miR-155-5p or mmu-mir-155 or mmu mir 155 or Mir155 or miR 155 or miRNA 155 or hsa mir 155 or microRNA 155 or miR-155 or miRNA 155 or hsa-mir-155 or microRNA-155).mp.<br>#3: #1 or #2<br>#4: exp B lymphocyte/<br>#5: B-cell lymphoma/<br>#6: (b-lymphocytes or B-cell).mp.<br>#7: exp lymphoma/<br>#8: lymphoma*.mp.<br>#9: or/#4-8<br>#10: #3 and #9<br>No filters |

**Figure S1.** Flow diagram of study selection

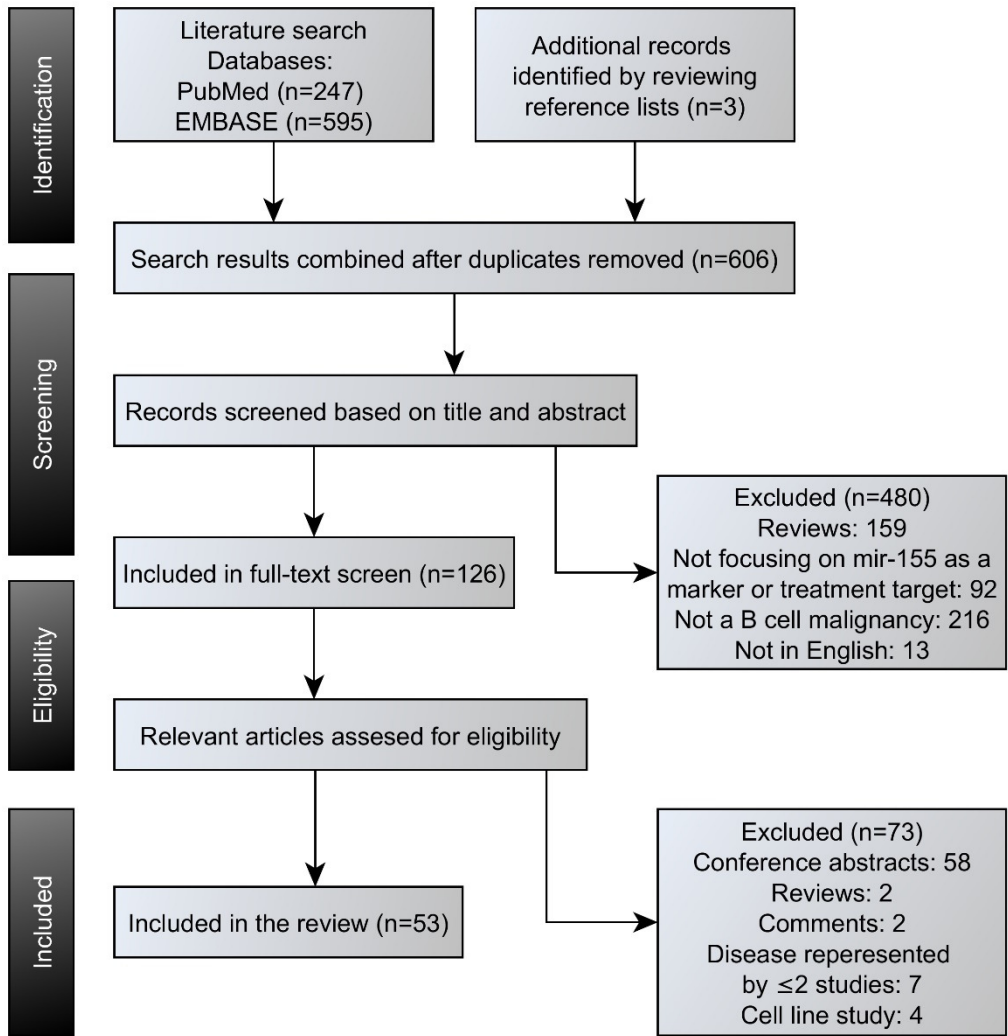

Supplement: f1 [file 9513037.f1.pdf]
